# Supplementary material
Source: PubMed Central journal article supplement (PMC3416614)
Supplement: AEM.01312-12_zam999103600so1.pdf [file AEM.01312-12_zam999103600so1.pdf]

## Supplementary Figures and Tables

**FIGURE S1. Predicted structural features of *M. sedula* MCE.** A) Multiple amino acid sequence alignment for MCE from *M. sedula*, *P. shermanii*, *T. tengcongensis*, and hypothetical protein of *Bacillus halodurans* C-125 (PDB: 3OA4). The conserved amino acid residues are shaded black, similar amino acids are boxed, and predicted residues for divalent cation binding are indicated by arrows. B) Predicted structure of *M. sedula* MMCE monomer, based on hypothetical protein BH1468 (PDB: [3OA4](#)) from *Bacillus halodurans* C-125, using the ModWeb online server (1, 2). C) The predicted metal binding site of *M. sedula* MCE, identified by comparison with that of *P. shermanii* and *T. tengcongensis* MCEs, metal binding residues were predicted to be H<sup>8</sup>, E<sup>57</sup>, H<sup>84</sup>, and E<sup>134</sup>.

**Figure S2. Alignment of amino acid sequences of MCM- $\alpha$  from archaea and bacteria, and other coenzyme B<sub>12</sub>-dependent enzymes.** The enzymes shown are as follows: MCM- $\alpha$  of *M. sedula* DSM 5348 (MCM $\alpha$ \_Mse), MCM- $\alpha$  of *M. cuprina* Ar-4 (MCM $\alpha$ \_Mcu), MCM- $\alpha$  of *S. solfataricus* P2 (MCM $\alpha$ \_Sso), MCM- $\alpha$  of *S. tokodaii* str. 7 (MCM $\alpha$ \_Sto), MCM- $\alpha$  of *S. acidocaldarius* DSM 639 (MCM $\beta$ \_Sac), MCM- $\alpha$  of *S. islandicus* M.14.25 (MCM $\alpha$ \_Sis), MCM- $\alpha$  of *A. hospitalis* W1 (MCM $\alpha$ \_Aho), MCM- $\alpha$  of *V. moutnovskia* 768-28 (MCM $\alpha$ \_Vmo), MCM- $\alpha$  of *V. distributa* DSM 14429 (MCM $\alpha$ \_Vdi), MCM- $\alpha$  of *A. saccharovorans* 345-15 (MCM $\alpha$ \_Asa), MCM- $\alpha$  of *T. sibiricus* MM 739 (MCM $\alpha$ \_Tsi), MCM- $\alpha$  of *T. barophilus* MP (MCM $\alpha$ \_Tba), MCM- $\alpha$  of *P. furiosus* DSM 3638 (MCM $\alpha$ \_Pfu), MCM- $\alpha$  of *P. sp.* NA2 (MCM $\alpha$ \_Psp), MCM- $\alpha$  of *P. horikoshii* OT3 (MCM $\alpha$ \_Pho), MCM- $\alpha$  of *T. gammatolerans* EJ3 (MCM $\alpha$ \_Tga), MCM- $\alpha$  of *P. abyssi* GE5 (MCM $\alpha$ \_Pab), MCM- $\alpha$  of *T. onnurineus* NA1 (MCM $\alpha$ \_Ton), MCM- $\alpha$  of *C. sp.* Y-400-fl (MCM $\alpha$ \_Csp), MCM- $\alpha$  of *C. aurantiacus* J-10-fl (MCM $\alpha$ \_Cau), MCM- $\alpha$  of *C. aggregans* DSM 9485 (MCM $\alpha$ \_Cag), N-terminal of MCM- $\alpha$  of *H. sapiens* (MCM $\alpha$ \_Hsa), N-terminal of MCM- $\alpha$  of *M. musculus* (MCM $\alpha$ \_Mmu), N-terminal of MCM- $\alpha$  of *P. shermanii* (MCM $\alpha$ \_Psh),  $\alpha$ -subunit of isobutyryl-CoA mutase of *S. cinnamomensis* (ICM $\alpha$ \_Sci),  $\alpha$ -subunit of glutamate mutase of *C. tetanomorphum* (GLM $\alpha$ \_Cte).

**Figure S3. A) Alignment of amino acid sequences of MCM- $\beta$  from archaea and bacteria, and other coenzyme B<sub>12</sub>-dependent enzymes.** The enzymes shown are listed as follows: MCM- $\beta$  of *M. sedula* DSM 5348 (MCM $\beta$ \_Mse), MCM- $\beta$  of *A. pernix* K1 (MCM $\beta$ \_Ape), *V. moutnovskia* 768-28 (MCM $\beta$ \_Vmo), MCM- $\beta$  of *A. saccharovorans* 345-15 (MCM $\beta$ \_Asa), MCM- $\beta$  of *T. sibiricus* MM 739 (MCM $\beta$ \_Tsi), MCM- $\beta$  of *C. sp.* Y-400-fl (MCM $\beta$ \_Csp), C-terminal of MCM- $\alpha$  of *H. sapiens* (MCM $\alpha$ \_Hsa), C-terminal of MCM- $\alpha$  of *M. musculus* (MCM $\alpha$ \_Mmu), C-terminal of MCM- $\alpha$  of *P. shermanii* (MCM $\alpha$ \_Psh),  $\beta$ -subunit of isobutyryl-CoA mutase of *S. cinnamomensis* (ICM  $\beta$ \_Sci),  $\beta$ -subunit of glutamate mutase of *C. tetanomorphum* (GLM $\beta$ \_Cte). The conserved amino acids are shaded black, and similar amino acids are boxed. The fingerprint “DXHXXG-SXL-GG” (where X is any amino acid) is indicated by an arrow. The residues H<sup>21</sup>-D<sup>19</sup>-K<sup>15</sup> for the hydrogen-bonding network for coenzyme B<sub>12</sub> binding was indicated by asterisk. **B) Three dimensional model prediction for MCM- $\alpha$  (B) and MCM- $\beta$  (C).** The three dimensional model of MCM- $\alpha$  and MCM- $\beta$  were based, respectively, on MCM (PDB: [2XIJ](#), *Homo sapiens*) and MCM- $\beta$  (PDB: [2YXB](#), *Aeropyrum Pernix*), using the ModWeb online server.

**Figure S4. Relationship of 3-hydroxypropionate/4-hydroxybutyrate cycle with the metabolism of branched amino acids (valine, leucine, isoleucine, methionine) and propanoate to central carbon metabolism.** Enzymes E1: ACC; E2: MCR; E3: MSR; E4: HPCS; E5: HPCD; E6: ACR; E7: MCE; E8: MCM; E9: SSR; E10: HBCS; E11: HBCD; E12: CCH; E13: ACK; E14: acetate kinase; E15: acetate-CoA ligase; E16: branched-chain-amino-acid transaminase; E17: 3-methyl-2-oxobutanoate dehydrogenase; E18: acyl-CoA dehydrogenase; E19: enoyl-CoA hydratase; E20: 3-hydroxyisobutyryl-CoA hydrolase; E21: 3-hydroxyisobutyrate dehydrogenase; E22: methylmalonate-semialdehyde dehydrogenase; E23: 3-hydroxyacyl-CoA dehydrogenase; E24: acetyl-CoA C-acyltransferase.

**SUPPLEMENTARY TABLES AND FIGURES**

**TABLE S1. Primer sequences used for cloning *M. sedula* MCE (Msed\_0639) and MCM (Msed\_0638, Msed\_2055)**

| <b>Gene</b>  | <b>Orientation</b> | <b>Sequence</b>                                 |
|--------------|--------------------|-------------------------------------------------|
| <i>mce</i>   | Forward            | 5'-GACGACGACAAGATGAAGGGCAACAGTAAAGAAAG-3'       |
|              | Reverse            | 5'-GAGGAGAAGCCCGGTAAACAACCTTCCACTTTTG-3'        |
| <i>mcm-a</i> | Forward            | 5'-CCCATTATACCTATTCTCTTCACTTTGCTCTCCTCTGCG-3'   |
|              | Reverse            | 5'-TGCTCAATTGAGCGATTTTTTCATCCAAGGTCATCCTGG-3'   |
| <i>mcm-β</i> | Forward            | 5'-GATGGACTGGTGGTGTCTGGCTTACTTTGGTGTTAATATGC-3' |
|              | Reverse            | 5'-GCATATTAACACCAAAGTAAGCCGACACCACCAGTCCATC-3'  |

**TABLE S2. Enzymes of 3-hydroxypropionate/4-hydroxybutyrate cycle**

|                                      |                                        | Identified in genome (Y/N) |                  |                  |                   |                   |                  |                  |                  |                  |                   |                   |                  |                  |
|--------------------------------------|----------------------------------------|----------------------------|------------------|------------------|-------------------|-------------------|------------------|------------------|------------------|------------------|-------------------|-------------------|------------------|------------------|
|                                      |                                        | ACC <sup>1</sup>           | MCR <sup>1</sup> | MSR <sup>1</sup> | HPCS <sup>1</sup> | HPCD <sup>1</sup> | ACR <sup>1</sup> | MCE <sup>1</sup> | MCM <sup>1</sup> | SSR <sup>1</sup> | HBCS <sup>1</sup> | HBCD <sup>1</sup> | CCH <sup>1</sup> | ACK <sup>1</sup> |
| Sulfolobaceae                        | <i>Metallosphaera sedula</i> DSM       | Y                          | Y                | Y                | Y                 | Y                 | Y                | Y                | Y                | Y                | N/A <sup>2</sup>  | Y                 | Y                | Y                |
|                                      | <i>Metallosphaera cuprina</i> Ar-4     | Y                          | Y                | Y                | Y                 | Y                 | Y                | Y                | Y                | Y                | N/A               | Y                 | Y                | Y                |
|                                      | <i>Acidianus hospitalis</i> W1         | Y                          | Y                | Y                | Y                 | Y                 | Y                | Y                | Y                | Y                | N/A               | Y                 | Y                | Y                |
|                                      | <i>Sulfolobus tokodaii</i> str. 7      | Y                          | Y                | Y                | Y                 | Y                 | Y                | Y                | Y                | Y                | N/A               | Y                 | Y                | Y                |
|                                      | <i>Sulfolobus acidocaldarius</i> DSM   | Y                          | Y                | Y                | Y                 | Y                 | Y                | Y                | Y                | Y                | N/A               | Y                 | Y                | Y                |
|                                      | <i>Sulfolobus islandicus</i> Y.G.57.14 | Y                          | Y                | Y                | Y                 | Y                 | Y                | Y                | Y                | Y                | N/A               | Y                 | Y                | Y                |
|                                      | <i>Sulfolobus islandicus</i> Y.N.15.51 | Y                          | Y                | Y                | Y                 | Y                 | Y                | Y                | Y                | Y                | N/A               | Y                 | Y                | Y                |
|                                      | <i>Sulfolobus islandicus</i> L.S.2.15  | Y                          | Y                | Y                | Y                 | Y                 | Y                | Y                | Y                | Y                | N/A               | Y                 | Y                | Y                |
|                                      | <i>Sulfolobus islandicus</i> L.D.8.5   | Y                          | Y                | Y                | Y                 | Y                 | Y                | Y                | Y                | Y                | N/A               | Y                 | Y                | Y                |
|                                      | <i>Sulfolobus islandicus</i> M.16.4    | Y                          | Y                | Y                | Y                 | Y                 | Y                | Y                | Y                | Y                | N/A               | Y                 | Y                | Y                |
|                                      | <i>Sulfolobus solfataricus</i> P2      | Y                          | Y                | Y                | Y                 | Y                 | Y                | Y                | Y                | Y                | N/A               | Y                 | Y                | Y                |
| <i>Sulfolobus islandicus</i> M.14.25 | Y                                      | Y                          | Y                | Y                | Y                 | Y                 | Y                | Y                | Y                | N/A              | Y                 | Y                 | Y                |                  |
| Thermoproteales                      | <i>Vulcanisaeta moutnovskia</i> 768-28 | N                          | N                | N                | Y                 | N                 | Y                | N                | Y                | N                | N/A               | N                 | Y                | Y                |
|                                      | <i>Vulcanisaeta distributa</i> DSM     | N                          | N                | N                | Y                 | Y                 | Y                | Y                | Y                | N                | N/A               | N                 | Y                | Y                |
| Acidilobales                         | <i>Acidilobus saccharovorans</i> 345-  | N                          | N                | N                | Y                 | Y                 | Y                | N                | Y                | N                | N/A               | N                 | Y                | Y                |
| Desulfurococcales                    | <i>Aeropyrum permix</i> K1             | N                          | N                | N                | N                 | Y                 | N                | N                | Y                | N                | N/A               | N                 | Y                | Y                |
|                                      | <i>Ignicoccus hospitalis</i> KIN4/I    | N                          | Y                | N                | N                 | N                 | N                | N                | N                | N                | N/A               | Y                 | Y                | Y                |
| Euryarchaeotes<br>(Thermococcales)   | <i>Thermococcus sibiricus</i> MM 739   | N                          | N                | N                | N                 | N                 | N                | Y                | Y                | N                | N/A               | N                 | N                | N                |
|                                      | <i>Thermococcus barophilus</i> MP      | N                          | N                | N                | N                 | N                 | N                | Y                | Y                | N                | N/A               | N                 | N                | N                |
|                                      | <i>Pyrococcus furiosus</i> DSM 3638    | N                          | N                | N                | N                 | N                 | N                | Y                | Y                | N                | N/A               | N                 | N                | N                |
|                                      | <i>Pyrococcus</i> sp. NA2              | N                          | Y                | N                | N                 | N                 | N                | Y                | Y                | N                | N/A               | N                 | N                | N                |
|                                      | <i>Pyrococcus horikoshii</i> OT3       | N                          | N                | N                | N                 | N                 | N                | Y                | Y                | N                | N/A               | N                 | N                | N                |

|                |                                         |   |   |   |   |   |   |   |   |   |     |   |   |   |
|----------------|-----------------------------------------|---|---|---|---|---|---|---|---|---|-----|---|---|---|
|                | <i>Thermococcus gammatolerans</i>       | N | N | N | Y | N | N | Y | Y | N | N/A | N | N | N |
|                | <i>Pyrococcus abyssi</i> GE5            | N | N | N | N | N | N | Y | Y | N | N/A | N | N | N |
|                | <i>Thermococcus onnurineus</i> NA1      | N | N | N | N | N | N | Y | Y | N | N/A | N | N | N |
| Chloroflexales | <i>Chloroflexus</i> sp. Y-400-fl        | Y | Y | N | N | N | N | Y | Y | N | N/A | N | N | N |
|                | <i>Chloroflexus aurantiacus</i> J-10-fl | Y | Y | N | N | N | N | Y | Y | N | N/A | N | N | N |
|                | <i>Chloroflexus aggregans</i> DSM       | Y | Y | N | N | N | N | Y | Y | N | N/A | N | N | N |

<sup>1</sup>ACC(Msed\_0147, 0148, 1375), MCR(Msed\_0709) , MSR(Msed\_1993) , HPCS(Msed\_1456),HPCD(Msed\_2001), ACR(Msed\_1426) , MCE(Msed\_0639), MCM(Msed\_0638, Msed\_2055), SSR(Msed\_1424), HBCS, HBCD(Msed\_1321), CCH(Msed\_0399), ACK(Msed\_0656).

<sup>2</sup>N/A: No information is available.

**TABLE S3. Comparisons of putative gene clusters containing MCE, MCM in microbial genomes**

| Organism        |                                          | Genetic constitution | PF <sup>1</sup> |
|-----------------|------------------------------------------|----------------------|-----------------|
| Sulfolobaceae   | <i>Metallosphaera sedula</i> DSM 5348    |                      | AB <sup>2</sup> |
|                 | <i>Metallosphaera cuprina</i> Ar-4       |                      |                 |
|                 | <i>Acidianus hospitalis</i> W1           |                      |                 |
|                 | <i>Sulfolobus tokodaii</i> str. 7        |                      |                 |
|                 | <i>Sulfolobus acidocaldarius</i> DSM 639 |                      |                 |
|                 | <i>Sulfolobus islandicus</i>             |                      |                 |
|                 | <i>Sulfolobus islandicus</i> Y.N.15.51   |                      |                 |
|                 | <i>Sulfolobus islandicus</i> L.S.2.15    |                      |                 |
|                 | <i>Sulfolobus islandicus</i> L.D.8.5     |                      |                 |
|                 | <i>Sulfolobus islandicus</i> M.16.4      |                      |                 |
|                 | <i>Sulfolobus solfataricus</i> P2        |                      |                 |
|                 | <i>Sulfolobus islandicus</i> M.14.25     |                      |                 |
| Thermoproteales | <i>Vulcanisaeta moutnovskia</i> 768-28   |                      | B <sup>2</sup>  |
|                 | <i>Vulcanisaeta distributa</i> DSM 14429 |                      |                 |
| Acidilobales    | <i>Acidilobus saccharovorans</i> 345-15  |                      |                 |

|                                                                                                                                                                                                                                                             |                                         |  |                 |
|-------------------------------------------------------------------------------------------------------------------------------------------------------------------------------------------------------------------------------------------------------------|-----------------------------------------|--|-----------------|
| Desulfurococcales                                                                                                                                                                                                                                           | <i>Aeropyrum pernix</i> K1              |  |                 |
| Euryarchaeotes<br>(Thermococcales)                                                                                                                                                                                                                          | <i>Thermococcus sibiricus</i> MM 739    |  |                 |
|                                                                                                                                                                                                                                                             | <i>Thermococcus barophilus</i> MP       |  |                 |
|                                                                                                                                                                                                                                                             | <i>Pyrococcus furiosus</i> DSM 3638     |  |                 |
|                                                                                                                                                                                                                                                             | <i>Pyrococcus</i> sp. NA20788           |  |                 |
|                                                                                                                                                                                                                                                             | <i>Pyrococcus horikoshii</i> OT3        |  |                 |
|                                                                                                                                                                                                                                                             | <i>Thermococcus gammatolerans</i> EJ3   |  |                 |
|                                                                                                                                                                                                                                                             | <i>Pyrococcus abyssi</i> GE5            |  |                 |
|                                                                                                                                                                                                                                                             | <i>Thermococcus onnurineus</i> NA1      |  |                 |
| Chloroflexales                                                                                                                                                                                                                                              | <i>Chloroflexus</i> sp. Y-400-fl        |  | BC <sup>2</sup> |
|                                                                                                                                                                                                                                                             | <i>Chloroflexus aurantiacus</i> J-10-fl |  |                 |
|                                                                                                                                                                                                                                                             | <i>Chloroflexus aggregans</i> DSM 9485  |  |                 |
|                                                                                                                                                                                                                                                             |                                         |  |                 |
| <sup>1</sup> PF: proposed function;                                                                                                                                                                                                                         |                                         |  |                 |
| <sup>2</sup> A: Autotrophic carbon fixation through 3-hydroxypropionate/4-hydroxybutyrate cycle; B: Metabolism of branched amino acids (valine, isoleucine, methionine) and propanoate. C: Autotrophic carbon fixation through 3-Hydroxypropionate bicycle. |                                         |  |                 |

**TABLE S4. Methylmalonyl-CoA epimerase and methylmalonyl-CoA mutase homologs**

| Organism                           |                                          | MCE (Msed_0639) |              | MCM- $\alpha$ (Msed_0638) |              | MCM- $\beta$ (Msed_2055) |              |
|------------------------------------|------------------------------------------|-----------------|--------------|---------------------------|--------------|--------------------------|--------------|
|                                    |                                          | Gene symbol     | Identity (%) | Gene symbol               | Identity (%) | Gene symbol              | Identity (%) |
| Sulfolobaceae                      | <i>Metallosphaera sedula</i> DSM 5348    | Msed_0639       | 100          | Msed_0638                 | 100          | Msed_2055                | 100          |
|                                    | <i>Metallosphaera cuprina</i> Ar-4       | Mcup_1517       | 91           | Mcup_1516                 | 93           | Mcup_0235                | 86           |
|                                    | <i>Acidianus hospitalis</i> W1           | Ahos_2217       | 67           | Ahos_2216                 | 83           | Ahos_0509                | 78           |
|                                    | <i>Sulfolobus tokodaii</i> str. 7        | ST0554          | 74           | ST0552                    | 82           | ST2096                   | 76           |
|                                    | <i>Sulfolobus acidocaldarius</i> DSM 639 | Saci_0923       | 64           | Saci_0924                 | 79           | Saci_0062                | 74           |
|                                    | <i>Sulfolobus islandicus</i> Y.G.57.14   | YG5714_0220     | 66           | YG5714_0219               | 79           | YG5714_0078              | 76           |
|                                    | <i>Sulfolobus islandicus</i> Y.N.15.51   | YN1551_2823     | 66           | YN1551_2822               | 79           | YN1551_0076              | 76           |
|                                    | <i>Sulfolobus islandicus</i> L.S.2.15    | LS215_0247      | 65           | LS215_0246                | 79           | LS215_0076               | 76           |
|                                    | <i>Sulfolobus islandicus</i> L.D.8.5     | LD85_0221       | 66           | LD85_0220                 | 78           | LD85_0076                | 76           |
|                                    | <i>Sulfolobus islandicus</i> M.16.4      | M164_0235       | 66           | M164_0234                 | 79           | M164_0076                | 76           |
|                                    | <i>Sulfolobus solfataricus</i> P2        | SSO2425         | 64           | SSO2424                   | 78           | SSO2266                  | 79           |
|                                    | <i>Sulfolobus islandicus</i> M.14.25     | M1425_0216      | 65           | M1425_0215                | 78           | M1425_0076               | 76           |
| Thermoproteales                    | <i>Vulcanisaeta moutnovskia</i> 768-28   | VMUT_0926       | 43           | VMUT_0924                 | 61           | VMUT_0925                | 63           |
|                                    | <i>Vulcanisaeta distributa</i> DSM 14429 | Vdis_0039       | 42           | Vdis_0037                 | 61           | Vdis_0038                | 59           |
| Acidilobales                       | <i>Acidilobus saccharovorans</i> 345-15  | N/A             | N/A          | ASAC_1077                 | 57           | ASAC_1078                | 61           |
| Desulfurococcales                  | <i>Aeropyrum pernix</i> K1               | N/A             | N/A          | APE_1687                  | 57           | APE_1686                 | 63           |
|                                    | <i>Ignicoccus hospitalis</i> KIN4/I      | N/A             | N/A          | N/A                       | N/A          | N/A                      | N/A          |
| Euryarchaeotes<br>(Thermococcales) | <i>Thermococcus sibiricus</i> MM 739     | TSIB_1401       | 43           | TSIB_0812                 | 61           | TSIB_1402                | 59           |
|                                    | <i>Thermococcus barophilus</i> MP        | TERMP_1057      | 45           | TERMP_1292                | 61           | TERMP_1059               | 58           |
|                                    | <i>Pyrococcus furiosus</i> DSM 3638      | PF1948          | 46           | PF1477                    | 62           | PF1946                   | 60           |
|                                    | <i>Pyrococcus</i> sp. NA2                | PNA2_0788       | 48           | PNA2_1880                 | 62           | PNA2_0709                | 61           |



|                |                                         |             |    |             |    |             |    |
|----------------|-----------------------------------------|-------------|----|-------------|----|-------------|----|
|                | <i>Pyrococcus horikoshii</i> OT3        | PH0272      | 48 | PH1306      | 61 | PH0275      | 61 |
|                | <i>Thermococcus gammatolerans</i> EJ3   | TGAM_1929   | 46 | TGAM_1685   | 61 | TGAM_1931   | 55 |
|                | <i>Pyrococcus abyssi</i> GE5            | PAB2438     | 48 | PAB1800     | 62 | PABmcmA2    | 61 |
|                | <i>Thermococcus onnurineus</i> NA1      | TON_1074    | 45 | TON_1110    | 61 | TON_1076    | 63 |
| Chloroflexales | <i>Chloroflexus</i> sp. Y-400-fl        | Chy400_3283 | 39 | Chy400_1995 | 53 | Chy400_0048 | 56 |
|                | <i>Chloroflexus aurantiacus</i> J-10-fl | Caur_3037   | 39 | Caur_1844   | 53 | Caur_0042   | 56 |
|                | <i>Chloroflexus aggregans</i> DSM 9485  | Cagg_0981   | 41 | Cagg_2545   | 52 | Cagg_0587   | 56 |

**TABLE S5. Transcription analysis of gene cluster of MCE (Msed\_0639), MCM (Msed\_0638, Msed\_2055) for *M. sedula* under autotrophic (AC) and heterotrophic (HT) conditions.**

|                  | Annotation                                                            | Transcription level AC <sup>1</sup> | Transcription level HC <sup>2</sup> | Fold change <sup>3</sup> | Significance <sup>4</sup><br>(-log <sub>10</sub> P value) |
|------------------|-----------------------------------------------------------------------|-------------------------------------|-------------------------------------|--------------------------|-----------------------------------------------------------|
| <b>Msed_0637</b> | Phosphoribosyltransferase                                             | -0.31                               | 0.24                                | 0.68                     | 1.58                                                      |
| <b>Msed_0638</b> | Methylmalonyl-CoA mutase-catalytic subunit (α)                        | 4.36                                | 1.21                                | 8.91                     | 15.48                                                     |
| <b>Msed_0639</b> | Methylmalonyl-CoA epimerase                                           | 3.16                                | 1.00                                | 4.47                     | 6.54                                                      |
| <b>Msed_0640</b> | Heat shock protein Hsp20                                              | 2.74                                | 0.88                                | 3.63                     | 7.13                                                      |
| <b>Msed_0641</b> | ZPR1-related zinc finger protein                                      | 0.67                                | 1.01                                | 0.79                     | 0.71                                                      |
| <b>Msed_2054</b> | Hypothetical protein                                                  | -0.26                               | 1.37                                | 0.32                     | 5.26                                                      |
| <b>Msed_2055</b> | Methylmalonyl-CoA mutase-coenzyme B <sub>12</sub> binding subunit (β) | 3.14                                | 1.52                                | 3.08                     | 3.97                                                      |
| <b>Msed_2056</b> | LAO/AO transport system ATPase                                        | 1.83                                | -0.77                               | 6.05                     | 9.58                                                      |
| <b>Msed_2057</b> | Hypothetical protein                                                  | -0.05                               | -1.88                               | 3.57                     | 5.64                                                      |

<sup>1</sup> Least-squares mean (lsm) of normalized log<sub>2</sub>-transformed transcription levels; AC: Autotrophic condition

<sup>2</sup> Least-squares mean (lsm) of normalized log<sub>2</sub>-transformed transcription levels; HC: Heterotrophic condition

<sup>3</sup> Fold change = 2<sup>(AC-HC)</sup>

<sup>4</sup> Bonferroni correction for this data set was 5.4

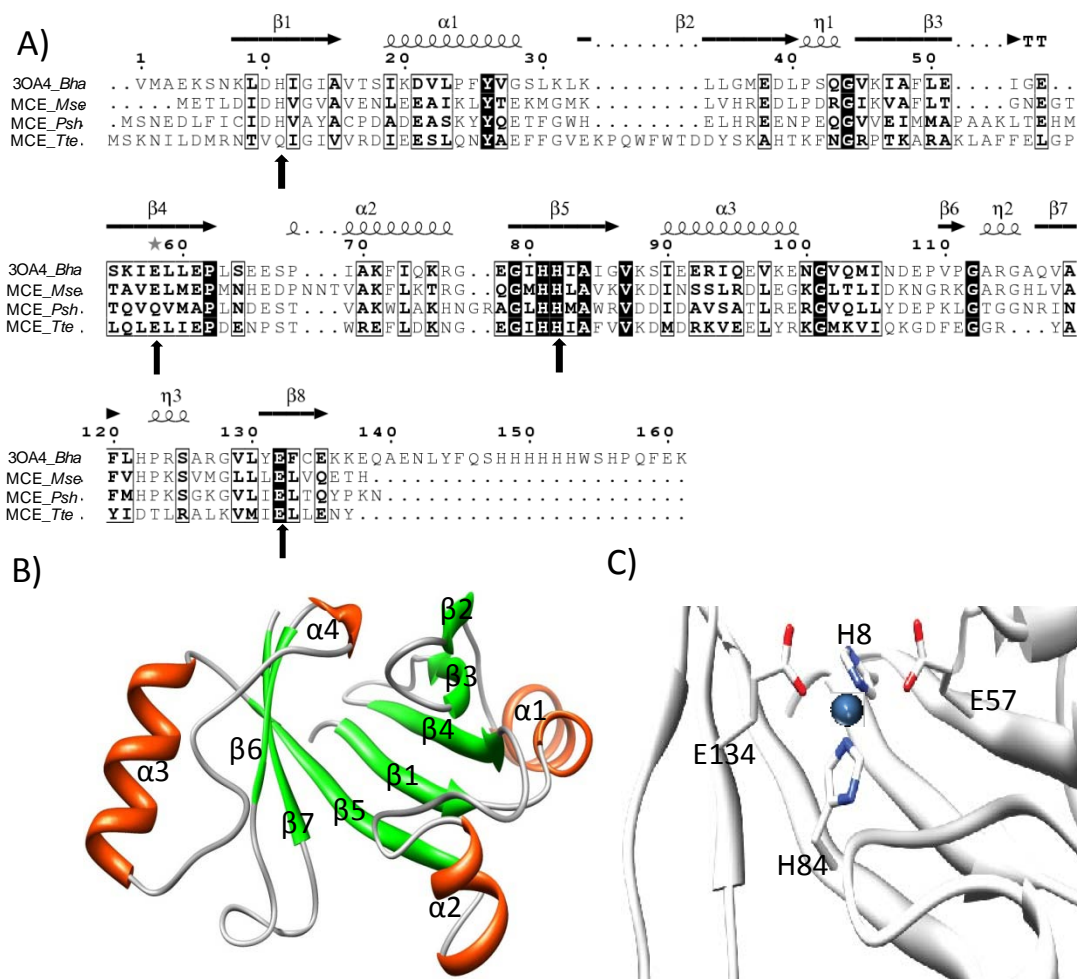

**FIGURE S1. Predicted structural features of *M. sedula* MCE.** A) Multiple amino acid sequence alignment for MCE from *M. sedula*, *P. shermanii*, *T. tengcongensis*, and hypothetical protein of *Bacillus halodurans* C-125 (PDB: 3OA4). The conserved amino acid residues are shaded black, similar amino acids are boxed, and predicted residues for divalent cation binding are indicated by arrows. B) Predicted structure of *M. sedula* MMCE monomer, based on hypothetical protein BH1468 (PDB: [3OA4](#)) from *Bacillus halodurans* C-125, using the ModWeb online server (1, 2). C) The predicted metal binding site of *M. sedula* MCE, identified by comparison with that of *P. shermanii* and *T. tengcongensis* MCEs, metal binding residues were predicted to be H<sup>8</sup>, E<sup>57</sup>, H<sup>84</sup>, and E<sup>134</sup>.

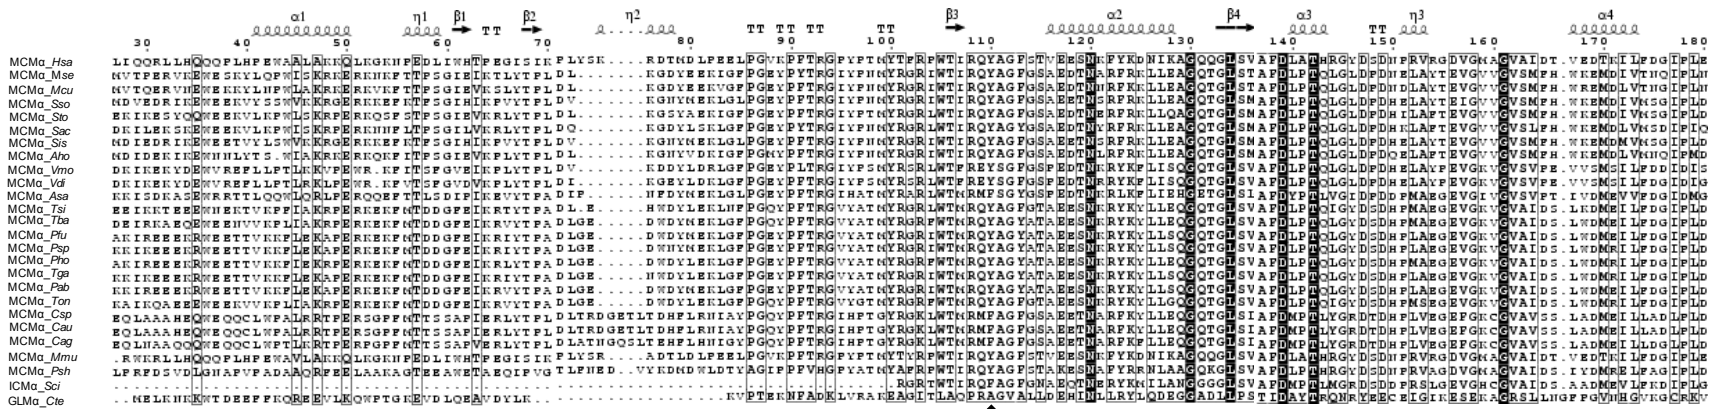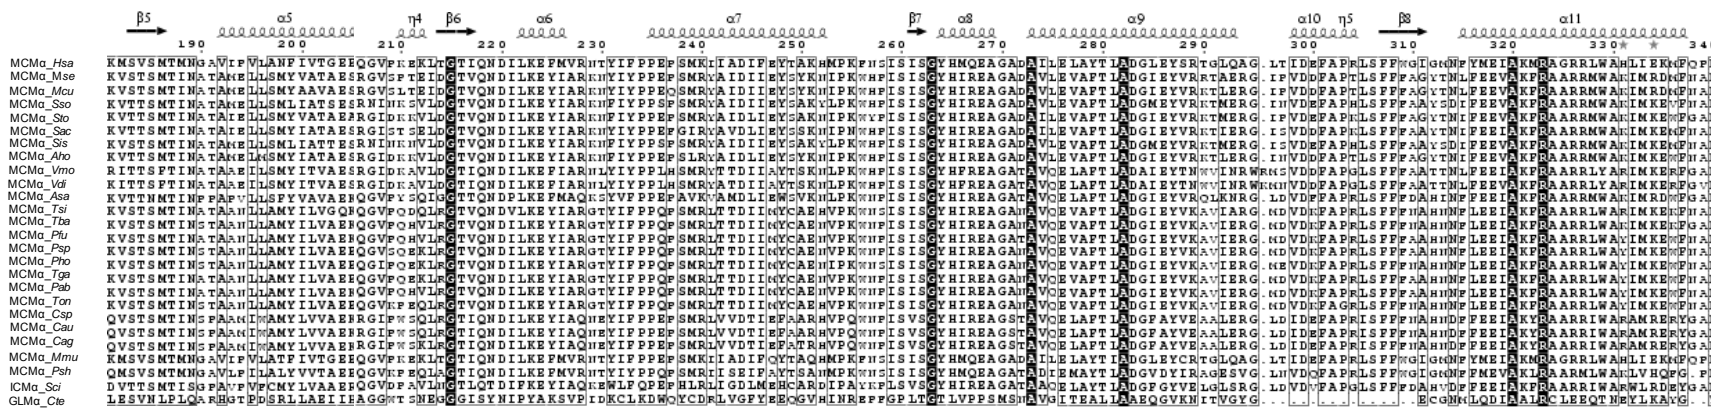

MCMa\_Hsa LIQORLLHQQOPLRFENALAKKQLKGNHFDLILHHEPISISIKFLYSR...RDTIDLPEELPGVYRPFTRGYPYPTQTFEPRWTRIQYAGFQSSAEDDNRFRRLLEAGQTGSTAPDLPLQLGLDDEHDLAETVEGVVGVSMFHKRMDLVTHGDFLH  
 MCMa\_Mse NVTFERVDEKESKYLQPLKIKRKRRIKHFITPSSGELHNTLYTFLDLD...KGDVEKHYGPGVYRPFTRGYPYPTQTFEPRWTRIQYAGFQSSAEDDNRFRRLLEAGQTGSTAPDLPLQLGLDDEHDLAETVEGVVGVSMFHKRMDLVTHGDFLH  
 MCMa\_Mcu NVTOBRVDEKESKYLQPLKIKRKRRIKHFITPSSGELHNTLYTFLDLD...KGDVEKHYGPGVYRPFTRGYPYPTQTFEPRWTRIQYAGFQSSAEDDNRFRRLLEAGQTGSTAPDLPLQLGLDDEHDLAETVEGVVGVSMFHKRMDLVTHGDFLH  
 MCMa\_Sso NDVDRIDKESKYLQPLKIKRKRRIKHFITPSSGELHNTLYTFLDLD...KGDVEKHYGPGVYRPFTRGYPYPTQTFEPRWTRIQYAGFQSSAEDDNRFRRLLEAGQTGSTAPDLPLQLGLDDEHDLAETVEGVVGVSMFHKRMDLVTHGDFLH  
 MCMa\_Sip EKLEIKYQDEKESKYLQPLKIKRKRRIKHFITPSSGELHNTLYTFLDLD...KGSXAKIIGPGVYRPFTRGYPYPTQTFEPRWTRIQYAGFQSSAEDDNRFRRLLEAGQTGSTAPDLPLQLGLDDEHDLAETVEGVVGVSMFHKRMDLVTHGDFLH  
 MCMa\_Sac DKLEIKYQDEKESKYLQPLKIKRKRRIKHFITPSSGELHNTLYTFLDLD...KGDVLSLQPGVYRPFTRGYPYPTQTFEPRWTRIQYAGFQSSAEDDNRFRRLLEAGQTGSTAPDLPLQLGLDDEHDLAETVEGVVGVSMFHKRMDLVTHGDFLH  
 MCMa\_Sis NDLEDRIDKESKYLQPLKIKRKRRIKHFITPSSGELHNTLYTFLDLD...KGDVLSLQPGVYRPFTRGYPYPTQTFEPRWTRIQYAGFQSSAEDDNRFRRLLEAGQTGSTAPDLPLQLGLDDEHDLAETVEGVVGVSMFHKRMDLVTHGDFLH  
 MCMa\_Aho NDLEDRIDKESKYLQPLKIKRKRRIKHFITPSSGELHNTLYTFLDLD...KGDVLSLQPGVYRPFTRGYPYPTQTFEPRWTRIQYAGFQSSAEDDNRFRRLLEAGQTGSTAPDLPLQLGLDDEHDLAETVEGVVGVSMFHKRMDLVTHGDFLH  
 MCMa\_V60 DKIKERVDKESKYLQPLKIKRKRRIKHFITPSSGELHNTLYTFLDLD...KDDVLDLQPGVYRPFTRGYPYPTQTFEPRWTRIQYAGFQSSAEDDNRFRRLLEAGQTGSTAPDLPLQLGLDDEHDLAETVEGVVGVSMFHKRMDLVTHGDFLH  
 MCMa\_V66 DKIKERVDKESKYLQPLKIKRKRRIKHFITPSSGELHNTLYTFLDLD...KDDVLDLQPGVYRPFTRGYPYPTQTFEPRWTRIQYAGFQSSAEDDNRFRRLLEAGQTGSTAPDLPLQLGLDDEHDLAETVEGVVGVSMFHKRMDLVTHGDFLH  
 MCMa\_Asa KRKESDIAKESKYLQPLKIKRKRRIKHFITPSSGELHNTLYTFLDLD...KFDKXNELLQPGVYRPFTRGYPYPTQTFEPRWTRIQYAGFQSSAEDDNRFRRLLEAGQTGSTAPDLPLQLGLDDEHDLAETVEGVVGVSMFHKRMDLVTHGDFLH  
 MCMa\_Tsi DEIKKTEDEKESKYLQPLKIKRKRRIKHFITPSSGELHNTLYTFLDLD...KNDVLELQPGVYRPFTRGYPYPTQTFEPRWTRIQYAGFQSSAEDDNRFRRLLEAGQTGSTAPDLPLQLGLDDEHDLAETVEGVVGVSMFHKRMDLVTHGDFLH  
 MCMa\_Tba DEIKKTEDEKESKYLQPLKIKRKRRIKHFITPSSGELHNTLYTFLDLD...KNDVLELQPGVYRPFTRGYPYPTQTFEPRWTRIQYAGFQSSAEDDNRFRRLLEAGQTGSTAPDLPLQLGLDDEHDLAETVEGVVGVSMFHKRMDLVTHGDFLH  
 MCMa\_Pfu AKIKREERDEKESKYLQPLKIKRKRRIKHFITPSSGELHNTLYTFLDLD...KNDVLELQPGVYRPFTRGYPYPTQTFEPRWTRIQYAGFQSSAEDDNRFRRLLEAGQTGSTAPDLPLQLGLDDEHDLAETVEGVVGVSMFHKRMDLVTHGDFLH  
 MCMa\_Psp AKIKREERDEKESKYLQPLKIKRKRRIKHFITPSSGELHNTLYTFLDLD...KNDVLELQPGVYRPFTRGYPYPTQTFEPRWTRIQYAGFQSSAEDDNRFRRLLEAGQTGSTAPDLPLQLGLDDEHDLAETVEGVVGVSMFHKRMDLVTHGDFLH  
 MCMa\_Tga AKIKREERDEKESKYLQPLKIKRKRRIKHFITPSSGELHNTLYTFLDLD...KNDVLELQPGVYRPFTRGYPYPTQTFEPRWTRIQYAGFQSSAEDDNRFRRLLEAGQTGSTAPDLPLQLGLDDEHDLAETVEGVVGVSMFHKRMDLVTHGDFLH  
 MCMa\_Pab AKIKREERDEKESKYLQPLKIKRKRRIKHFITPSSGELHNTLYTFLDLD...KNDVLELQPGVYRPFTRGYPYPTQTFEPRWTRIQYAGFQSSAEDDNRFRRLLEAGQTGSTAPDLPLQLGLDDEHDLAETVEGVVGVSMFHKRMDLVTHGDFLH  
 MCMa\_Ton KAKIQADEKESKYLQPLKIKRKRRIKHFITPSSGELHNTLYTFLDLD...KNDVLELQPGVYRPFTRGYPYPTQTFEPRWTRIQYAGFQSSAEDDNRFRRLLEAGQTGSTAPDLPLQLGLDDEHDLAETVEGVVGVSMFHKRMDLVTHGDFLH  
 MCMa\_Csp EQLAALAEQOQCLFALKRRTFRSGGPFNTSSAPFRLYFLDLDTRDGETLDFELRHIAYPGQVYRPFTRGYPYPTQTFEPRWTRIQYAGFQSSAEDDNRFRRLLEAGQTGSTAPDLPLQLGLDDEHDLAETVEGVVGVSMFHKRMDLVTHGDFLH  
 MCMa\_Cau EQLAALAEQOQCLFALKRRTFRSGGPFNTSSAPFRLYFLDLDTRDGETLDFELRHIAYPGQVYRPFTRGYPYPTQTFEPRWTRIQYAGFQSSAEDDNRFRRLLEAGQTGSTAPDLPLQLGLDDEHDLAETVEGVVGVSMFHKRMDLVTHGDFLH  
 MCMa\_Cag EQLHFAAQOQCLFALKRRTFRSGGPFNTSSAPFRLYFLDLDTRDGETLDFELRHIAYPGQVYRPFTRGYPYPTQTFEPRWTRIQYAGFQSSAEDDNRFRRLLEAGQTGSTAPDLPLQLGLDDEHDLAETVEGVVGVSMFHKRMDLVTHGDFLH  
 MCMa\_Mmu .RKRLKLLQOQPLRFENALAKKQLKGNHFDLILHHEPISISIKFLYSR...RDTIDLPEELPGVYRPFTRGYPYPTQTFEPRWTRIQYAGFQSSAEDDNRFRRLLEAGQTGSTAPDLPLQLGLDDEHDLAETVEGVVGVSMFHKRMDLVTHGDFLH  
 MCMa\_Psh LRFDDVLDLQOQPLRFENALAKKQLKGNHFDLILHHEPISISIKFLYSR...RDTIDLPEELPGVYRPFTRGYPYPTQTFEPRWTRIQYAGFQSSAEDDNRFRRLLEAGQTGSTAPDLPLQLGLDDEHDLAETVEGVVGVSMFHKRMDLVTHGDFLH  
 MCMa\_Sci .RRLTWTRQFAGFQSSAEDDNRFRRLLEAGQTGSTAPDLPLQLGLDDEHDLAETVEGVVGVSMFHKRMDLVTHGDFLH  
 GLMa\_Cte .HELDHNTKDEEFPKQDEEVLQWFTGHEVDLQEAADVLDL...KVPFPEHEDAKLVRAKAGATLQAPRAQVALLDHEHDLRLVLDQEGGADLIPSTDAVYRQNRVDEEELGKKEEELAGSLVLDGFGVGVGGRKLV

MCMa\_Hsa KNSVSMNTMNAVITPVLNANFIVTGEQGVPEKRLKLTQNDILKEFNVRNTYIPPEFSMRKLIADIEVYAKHMPKHFNISISGYHNQBAAGADLLELAYTLDGLYSRTGLQAGLTIDDFAPRLSFFPGLTGLDDEHDLAETVEGVVGVSMFHKRMDLVTHGDFLH  
 MCMa\_Mse KVSTSMNTINATAKELLSMYVATAESRGVFTEDLQVQNDILKEYIARKHNYIPPEFSMRKLIADIEVYAKHMPKHFNISISGYHIREAGADVLEVAFTLDGIYVVRRTAERGIFVDDFAPRLSFFPAGVTMLPEEVRKPAARRMWAHINRKHDFHAK  
 MCMa\_Mcu KVSTSMNTINATAKELLSMYAAVAESRGVGLTEIDQVQNDILKEYIARKHNYIPPEFSMRKLIADIEVYAKHMPKHFNISISGYHIREAGADVLEVAFTLDGIYVVRRTAERGIFVDDFAPRLSFFPAGVTMLPEEVRKPAARRMWAHINRKHDFHAK  
 MCMa\_Sso KVTSMNTINATAKELLSMLIATSRNHNKSVLQVQNDILKEYIARKHNYIPPEFSMRKLIADIEVYAKHMPKHFNISISGYHIREAGADVLEVAFTLDGMVEVVRRTMERRGIFVDDFAPRLSFFPAGVTMLPEEVRKPAARRMWAHINRKHDFHAK  
 MCMa\_Sip KVTSMNTINATAKELLSMYIATAESRGVFTEDLQVQNDILKEYIARKHNYIPPEFSMRKLIADIEVYAKHMPKHFNISISGYHIREAGADVLEVAFTLDGIYVVRRTAERGIFVDDFAPRLSFFPAGVTMLPEEVRKPAARRMWAHINRKHDFHAK  
 MCMa\_Sac KVTSMNTINATAKELLSMLIATSRNHNKSVLQVQNDILKEYIARKHNYIPPEFSMRKLIADIEVYAKHMPKHFNISISGYHIREAGADVLEVAFTLDGMVEVVRRTMERRGIFVDDFAPRLSFFPAGVTMLPEEVRKPAARRMWAHINRKHDFHAK  
 MCMa\_Aho KVTSMNTINATAKELLSMYIATAESRGVFTEDLQVQNDILKEYIARKHNYIPPEFSMRKLIADIEVYAKHMPKHFNISISGYHIREAGADVLEVAFTLDGIYVVRRTAERGIFVDDFAPRLSFFPAGVTMLPEEVRKPAARRMWAHINRKHDFHAK  
 MCMa\_V60 RTTSPFTINATAKELLSMYITVAESRGVFTEDLQVQNDILKEYIARKHNYIPPEFSMRKLIADIEVYAKHMPKHFNISISGYHIREAGADVLEVAFTLDGIYVVRRTAERGIFVDDFAPRLSFFPAGVTMLPEEVRKPAARRMWAHINRKHDFHAK  
 MCMa\_V66 KVTSMNTINATAKELLSMYITVAESRGVFTEDLQVQNDILKEYIARKHNYIPPEFSMRKLIADIEVYAKHMPKHFNISISGYHIREAGADVLEVAFTLDGIYVVRRTAERGIFVDDFAPRLSFFPAGVTMLPEEVRKPAARRMWAHINRKHDFHAK  
 MCMa\_Asa KVTSMNTINATAKELLSMYVAVAEQGVPEKRLKLTQNDILKEFNVRNTYIPPEFSMRKLIADIEVYAKHMPKHFNISISGYHIREAGADVLEVAFTLDGIYVVRRTAERGIFVDDFAPRLSFFPAGVTMLPEEVRKPAARRMWAHINRKHDFHAK  
 MCMa\_Tsi KVTSMNTINATAKELLSMYIATAESRGVFTEDLQVQNDILKEYIARKHNYIPPEFSMRKLIADIEVYAKHMPKHFNISISGYHIREAGADVLEVAFTLDGIYVVRRTAERGIFVDDFAPRLSFFPAGVTMLPEEVRKPAARRMWAHINRKHDFHAK  
 MCMa\_Tba KVTSMNTINATAKELLSMYIATAESRGVFTEDLQVQNDILKEYIARKHNYIPPEFSMRKLIADIEVYAKHMPKHFNISISGYHIREAGADVLEVAFTLDGIYVVRRTAERGIFVDDFAPRLSFFPAGVTMLPEEVRKPAARRMWAHINRKHDFHAK  
 MCMa\_Pfu KVTSMNTINATAKELLSMYIATAESRGVFTEDLQVQNDILKEYIARKHNYIPPEFSMRKLIADIEVYAKHMPKHFNISISGYHIREAGADVLEVAFTLDGIYVVRRTAERGIFVDDFAPRLSFFPAGVTMLPEEVRKPAARRMWAHINRKHDFHAK  
 MCMa\_Psp KVTSMNTINATAKELLSMYIATAESRGVFTEDLQVQNDILKEYIARKHNYIPPEFSMRKLIADIEVYAKHMPKHFNISISGYHIREAGADVLEVAFTLDGIYVVRRTAERGIFVDDFAPRLSFFPAGVTMLPEEVRKPAARRMWAHINRKHDFHAK  
 MCMa\_Tga KVTSMNTINATAKELLSMYIATAESRGVFTEDLQVQNDILKEYIARKHNYIPPEFSMRKLIADIEVYAKHMPKHFNISISGYHIREAGADVLEVAFTLDGIYVVRRTAERGIFVDDFAPRLSFFPAGVTMLPEEVRKPAARRMWAHINRKHDFHAK  
 MCMa\_Pab KVTSMNTINATAKELLSMYIATAESRGVFTEDLQVQNDILKEYIARKHNYIPPEFSMRKLIADIEVYAKHMPKHFNISISGYHIREAGADVLEVAFTLDGIYVVRRTAERGIFVDDFAPRLSFFPAGVTMLPEEVRKPAARRMWAHINRKHDFHAK  
 MCMa\_Ton KVTSMNTINATAKELLSMYIATAESRGVFTEDLQVQNDILKEYIARKHNYIPPEFSMRKLIADIEVYAKHMPKHFNISISGYHIREAGADVLEVAFTLDGIYVVRRTAERGIFVDDFAPRLSFFPAGVTMLPEEVRKPAARRMWAHINRKHDFHAK  
 MCMa\_Csp QVSTSMNTINATAKELLSMYLVVAEERGIPEKRLKLTQNDILKEFNVRNTYIPPEFSMRKLIADIEVYAKHMPKHFNISISGYHIREAGADVLEVAFTLDGIYVVRRTAERGIFVDDFAPRLSFFPAGVTMLPEEVRKPAARRMWAHINRKHDFHAK  
 MCMa\_Cau QVSTSMNTINATAKELLSMYLVVAEERGIPEKRLKLTQNDILKEFNVRNTYIPPEFSMRKLIADIEVYAKHMPKHFNISISGYHIREAGADVLEVAFTLDGIYVVRRTAERGIFVDDFAPRLSFFPAGVTMLPEEVRKPAARRMWAHINRKHDFHAK  
 MCMa\_Mmu KNSVSMNTMNAVITPVLNANFIVTGEQGVPEKRLKLTQNDILKEFNVRNTYIPPEFSMRKLIADIEVYAKHMPKHFNISISGYHNQBAAGADLLELAYTLDGLYSRTGLQAGLTIDDFAPRLSFFPGLTGLDDEHDLAETVEGVVGVSMFHKRMDLVTHGDFLH  
 MCMa\_Psh QVSTSMNTINATAKELLSMYLVVAEERGIPEKRLKLTQNDILKEFNVRNTYIPPEFSMRKLIADIEVYAKHMPKHFNISISGYHNQBAAGADLLELAYTLDGLYSRTGLQAGLTIDDFAPRLSFFPGLTGLDDEHDLAETVEGVVGVSMFHKRMDLVTHGDFLH  
 MCMa\_Sci DVTSMNTINATAKELLSMYLVVAEERGIPEKRLKLTQNDILKEFNVRNTYIPPEFSMRKLIADIEVYAKHMPKHFNISISGYHNQBAAGADLLELAYTLDGLYSRTGLQAGLTIDDFAPRLSFFPGLTGLDDEHDLAETVEGVVGVSMFHKRMDLVTHGDFLH  
 GLMa\_Cte LESVNLPLQARHGTEDSRLLAIEIHAAGFTSNEGGSYSYHIFAKSVIPEKCLKNDWCVDLHVGFEHAGVAINRFFPFLGTLVVPSMSHVAQITRALIAEQGVKMIITVGYG...EGHMLQDIEALDCELEBOTHEYLKAVG...Y

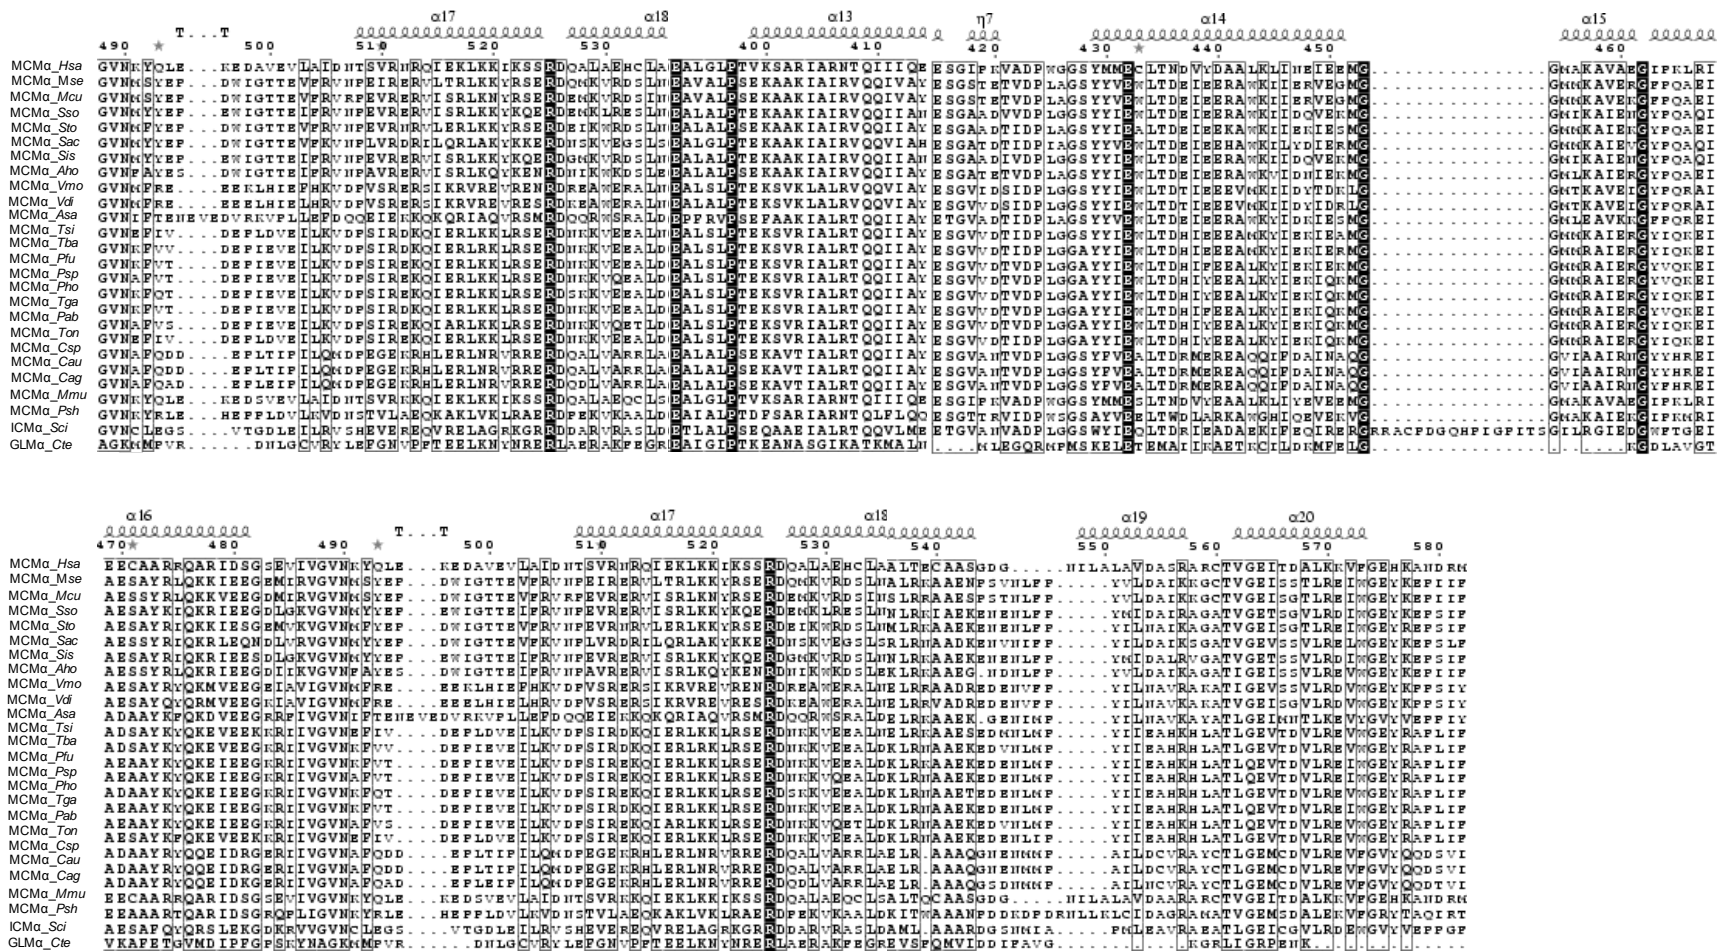

**Figure S2. Alignment of amino acid sequences of MCM-α from archaea and bacteria and other coenzyme B<sub>12</sub>-dependent enzymes.** The enzymes shown are as follows: MCM-α of *M. sedula* DSM 5348 (MCMα\_Mse), MCM-α of *M. cuprina* Ar-4 (MCMα\_Mcu), MCM-α of *S. solfataricus* P2 (MCMα\_Sso), MCM-α of *S. tokodaii* str. 7 (MCMα\_Sto), MCM-α of *S. acidocaldarius* DSM 639 (MCMβ\_Sac), MCM-α of *S. islandicus* M.14.25 (MCMα\_Sis), MCM-α of *A. hospitalis* W1 (MCMα\_Aho), MCM-α of *V. moutnovskia* 768-28 (MCMα\_Vmo), MCM-α of *V. distributa* DSM 14429 (MCMα\_Vdi), MCM-α of *A. saccharovorans* 345-15

(MCM $\alpha$ \_Asa), MCM- $\alpha$  of *T. sibiricus* MM 739 (MCM $\alpha$ \_Tsi), MCM- $\alpha$  of *T. barophilus* MP (MCM $\alpha$ \_Tba), MCM- $\alpha$  of *P. furiosus* DSM 3638 (MCM $\alpha$ \_Pfu), MCM- $\alpha$  of *P. sp.* NA2 (MCM $\alpha$ \_Psp), MCM- $\alpha$  of *P. horikoshii* OT3 (MCM $\alpha$ \_Pho), MCM- $\alpha$  of *T. gammatolerans* EJ3 (MCM $\alpha$ \_Tga), MCM- $\alpha$  of *P. abyssi* GE5 (MCM $\alpha$ \_Pab), MCM- $\alpha$  of *T. onnurineus* NA1 (MCM $\alpha$ \_Ton), MCM- $\alpha$  of *C. sp.* Y-400-fl (MCM $\alpha$ \_Csp), MCM- $\alpha$  of *C. aurantiacus* J-10-fl (MCM $\alpha$ \_Cau), MCM- $\alpha$  of *C. aggregans* DSM 9485 (MCM $\alpha$ \_Cag), N-terminal of MCM- $\alpha$  of *H. sapiens* (MCM $\alpha$ \_Hsa), N-terminal of MCM- $\alpha$  of *M. musculus* (MCM $\alpha$ \_Mmu), N-terminal of MCM- $\alpha$  of *P. shermanii* (MCM $\alpha$ \_Psh),  $\alpha$ -subunit of isobutyryl-CoA mutase of *S. cinnamomensis* (ICM $\alpha$ \_Sci),  $\alpha$ -subunit of glutamate mutase of *C. tetanomorphum* (GLM $\alpha$ \_Cte).



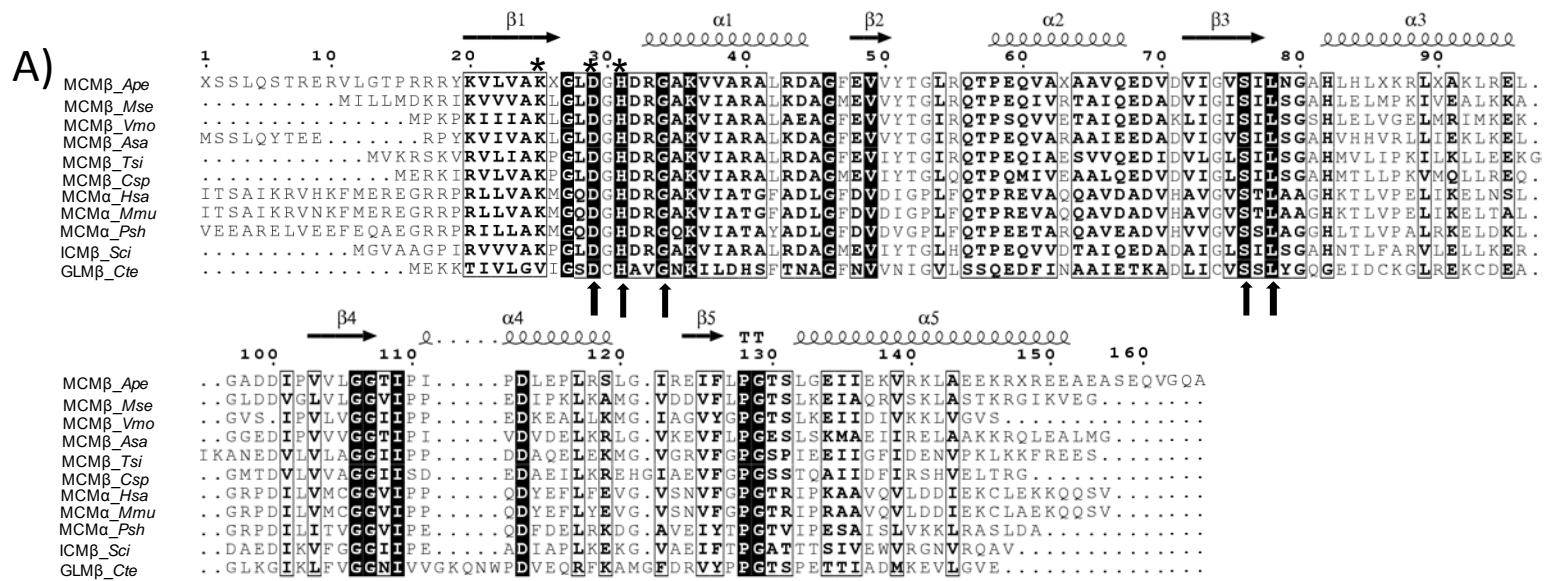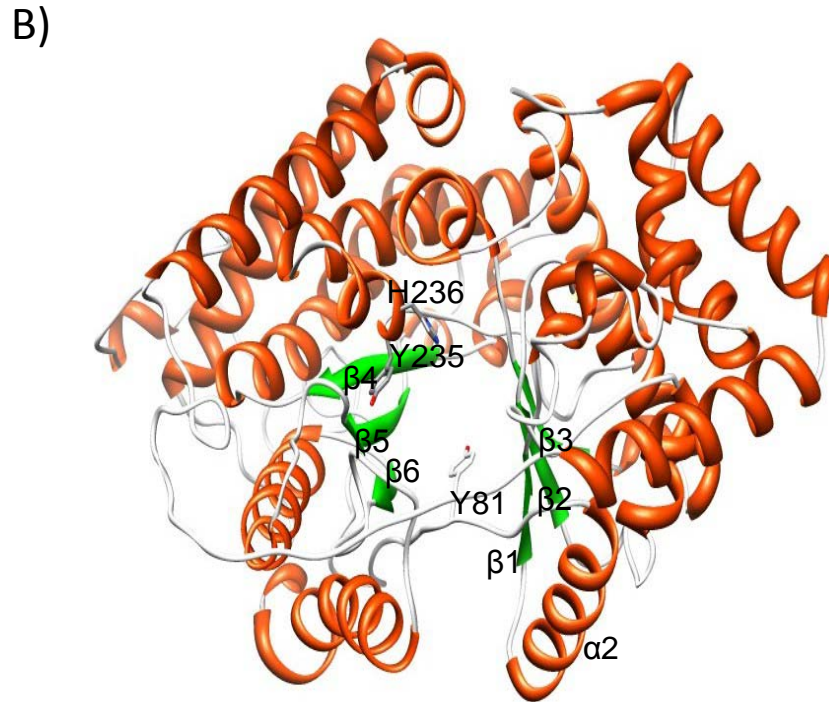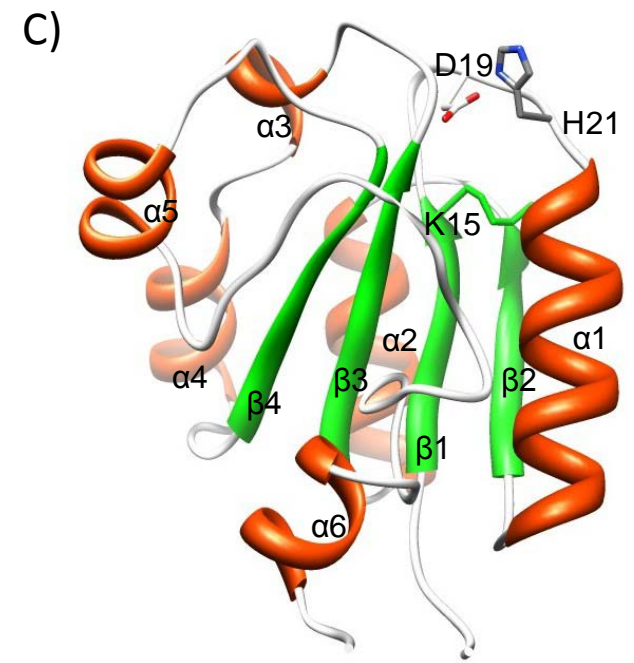

**Figure S3. A) Alignment of amino acid sequences of MCM- $\beta$  from archaea and bacteria, and other coenzyme B<sub>12</sub>-dependent enzymes.** The enzymes shown are listed as follows: MCM- $\beta$  of *M. sedula* DSM 5348 (MCM $\beta$ \_Mse), MCM- $\beta$  of *A. pernix* K1 (MCM $\beta$ \_Ape), *V. moutnovskia* 768-28 (MCM $\beta$ \_Vmo), MCM- $\beta$  of *A. saccharovorans* 345-15 (MCM $\beta$ \_Asa), MCM- $\beta$  of *T. sibiricus* MM 739 (MCM $\beta$ \_Tsi), MCM- $\beta$  of *C. sp.* Y-400-fl (MCM $\beta$ \_Csp), C-terminal of MCM- $\alpha$  of *H. sapiens* (MCM $\alpha$ \_Hsa), C-terminal of MCM- $\alpha$  of *M. musculus* (MCM $\alpha$ \_Mmu), C-terminal of MCM- $\alpha$  of *P. shermanii* (MCM $\alpha$ \_Psh),  $\beta$ -subunit of isobutyryl-CoA mutase of *S. cinnamomensis* (ICM  $\beta$ \_Sci),  $\beta$ -subunit of glutamate mutase of *C. tetanomorphum* (GLM $\beta$ \_Cte). The conserved amino acids are shaded black, and similar amino acids are boxed. The fingerprint “DXHXXG-SXL-GG” (where X is any amino acid) is indicated by an arrow. The residues H<sup>21</sup>-D<sup>19</sup>-K<sup>15</sup> for the hydrogen-bonding network for coenzyme B<sub>12</sub> binding was indicated by asterisk. **B) Three dimensional model prediction for MCM- $\alpha$  (B) and MCM- $\beta$  (C).** The three dimensional model of MCM- $\alpha$  and MCM- $\beta$  were based, respectively, on MCM (PDB: [2XIJ](#), *Homo sapiens*) and MCM- $\beta$  (PDB: [2YXB](#), *Aeropyrum Pernix*), using the ModWeb online server.



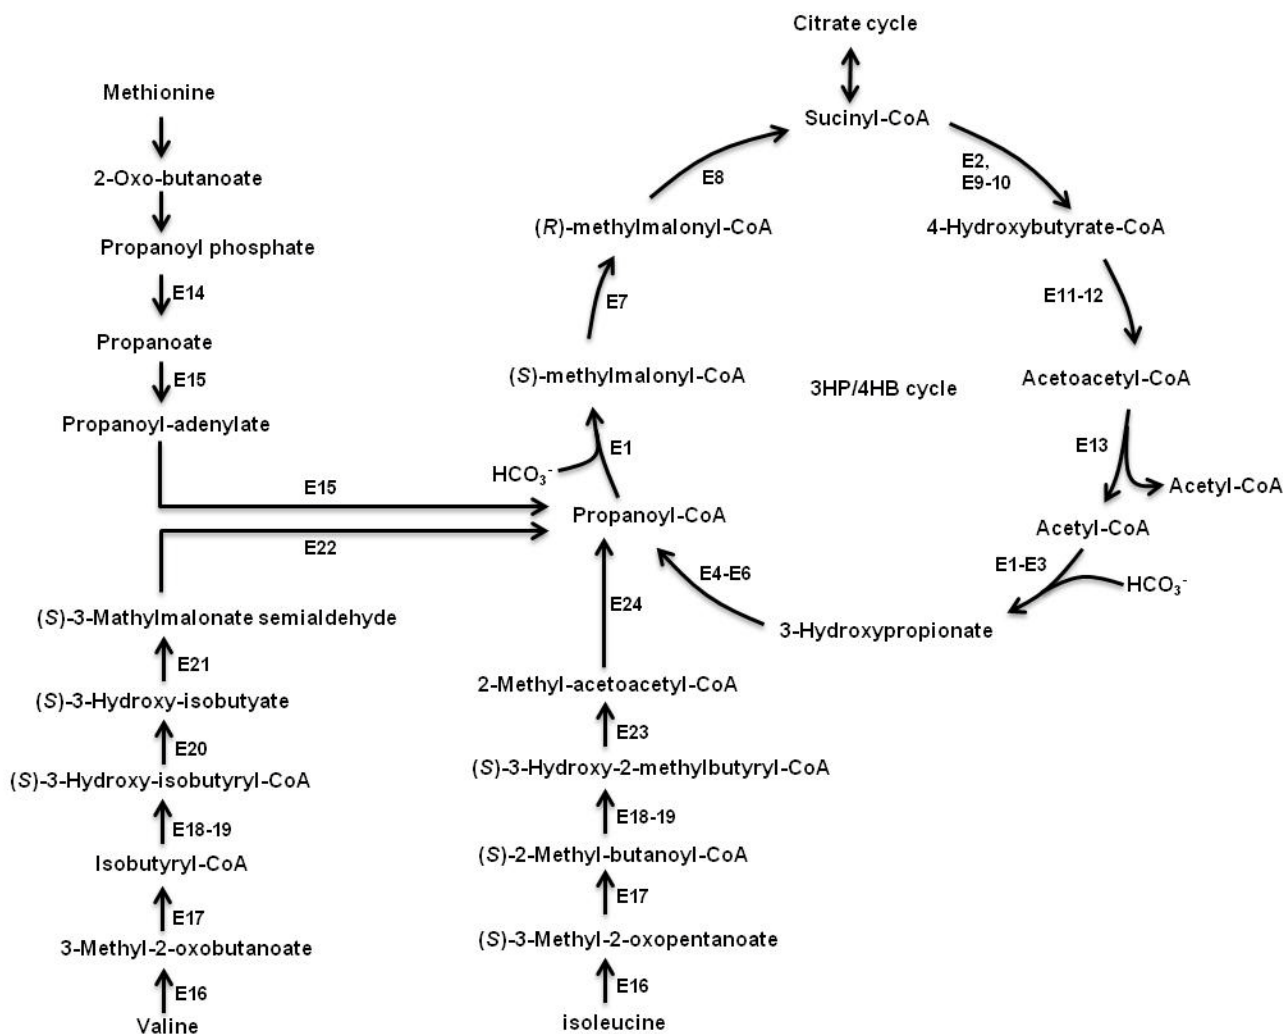

**Figure S4. Relationship of 3-hydroxypropionate/4-hydroxybutyrate cycle with the metabolism of branched amino acids (valine, leucine, isoleucine, methionine) and propanoate to central carbon metabolism.** Enzymes E1: ACC; E2: MCR; E3: MSR; E4: HPCS; E5: HPCD; E6: ACR; E7: MCE; E8: MCM; E9: SSR; E10: HBCS; E11: HBCD; E12: CCH; E13: ACK; E14: acetate kinase; E15: acetate-CoA ligase; E16: branched-chain-amino-acid transaminase; E17: 3-methyl-2-oxobutanoate dehydrogenase; E18: acyl-CoA dehydrogenase; E19: enoyl-CoA hydratase; E20: 3-hydroxyisobutyryl-CoA hydrolase; E21: 3-hydroxyisobutyrate dehydrogenase; E22: methylmalonate-semialdehyde dehydrogenase; E23: 3-hydroxyacyl-CoA dehydrogenase; E24: acetyl-CoA C-acyltransferase.

## REFERENCES

1. **Eswar N, John B, Mirkovic N, Fiser A, Ilyin V A, Pieper U, Stuart AC, Marti-Renom MA, Madhusudhan MS, Yerkovich B.** 2003. Tools for comparative protein structure modeling and analysis. *Nucleic Acids Res.* **31**:3375-3380.
2. **Eswar N, Webb B, Marti-Renom MA, Madhusudhan MS, Eramian D, Shen MY, Pieper U, Sali A.** 2007. Comparative protein structure modeling using Modeller. *Curr. Protoc. Protein Sci.* **50**:2.9.1-2.9.31.
